# Supplementary material for: Comprehensive mutational scanning of EGFR reveals TKI sensitivities of extracellular domain mutants
Source: PubMed Central journal article supplement (PMC10978866; doi:10.1038/s41467-024-45594-4), 2024-03-28
Supplement: 41467_2024_45594_MOESM3_ESM.pdf [file 41467_2024_45594_MOESM3_ESM.pdf]

**Supplementary Data 1. Functional EGFR variant enrichment scores.** Data are presented as Z-score values. A two-tailed t-test was performed to calculate p-values for each EGFR variant.

**Supplementary Data 2. Identification of novel EGFR variants.** Data are presented as Z-score values, with a cut-off of Z-score  $> 2$ . A two-tailed t-test was performed to calculate p-values for each EGFR variant. A literature comparison was performed to determine EGFR variant overlap from other EGFR variant studies.
